# Supplementary material for: Heavy Metal Contamination and Human Health Implications in the Chan Thnal Reservoir, Cambodia
Source: MDPI journal article supplement (doi:10.3390/su132413538), 2021-12-07
Supplement: s1 [file s1]

**Supplement Data****Table S1.** Water samples.

| <b>Variable</b> | <b>Mean</b> | <b>SE Mean</b> | <b>StDev</b> | <b>Minimum</b> | <b>Q1</b> | <b>Median</b> | <b>Q3</b> | <b>Maximum</b> | <b>Range</b> | <b>IQR</b> |
|-----------------|-------------|----------------|--------------|----------------|-----------|---------------|-----------|----------------|--------------|------------|
| Cd-New          | 1.2503      | 0.0518         | 0.1795       | 1.1169         | 1.1525    | 1.2079        | 1.2759    | 1.7860         | 0.6691       | 0.1234     |
| Pb-New          | 44.26       | 4.90           | 16.98        | 25.29          | 26.76     | 50.97         | 53.91     | 75.72          | 50.43        | 27.15      |
| Cu-New          | 13.56       | 3.58           | 12.41        | 5.19           | 6.14      | 10.45         | 14.74     | 50.41          | 45.21        | 8.61       |
| Zn-new          | 141.2       | 49.5           | 171.5        | 36.7           | 43.9      | 68.8          | 203.3     | 636.2          | 599.5        | 159.4      |
| Temperature     | 25.825      | 0.407          | 1.409        | 23.200         | 24.775    | 25.650        | 27.300    | 27.700         | 4.500        | 2.525      |
| pH              | 6.717       | 0.122          | 0.424        | 6.100          | 6.500     | 6.600         | 6.975     | 7.500          | 1.400        | 0.475      |
| DO              | 6.242       | 0.261          | 0.905        | 4.600          | 5.700     | 6.400         | 7.075     | 7.200          | 2.600        | 1.375      |

**Table S2.** Sediment samples.

| <b>Variable</b> | <b>Mean</b> | <b>SE Mean</b> | <b>StDev</b> | <b>Minimum</b> | <b>Q1</b> | <b>Median</b> | <b>Q3</b> | <b>Maximum</b> | <b>Range</b> | <b>IQR</b> |
|-----------------|-------------|----------------|--------------|----------------|-----------|---------------|-----------|----------------|--------------|------------|
| Cu              | 11.18       | 1.60           | 5.53         | 3.52           | 7.69      | 9.86          | 13.76     | 25.35          | 21.84        | 6.07       |
| Zn              | 20.18       | 2.56           | 8.88         | 6.98           | 13.58     | 20.21         | 25.17     | 39.70          | 32.72        | 11.58      |
| Pb              | 5.861       | 0.733          | 2.538        | 2.346          | 3.568     | 5.668         | 8.593     | 9.351          | 7.005        | 5.025      |
